# Supplementary material for: Combination of radiotherapy and vaccination overcomes checkpoint blockade resistance
Source: PubMed Central journal article supplement (PMC5190006; doi:10.18632/oncotarget.9915), 2016-06-07
Supplement: oncotarget-07-43039-s001.pdf [file oncotarget-07-43039-s001.pdf]

## Combination of radiotherapy and vaccination overcomes checkpoint blockade resistance

### Supplementary Materials

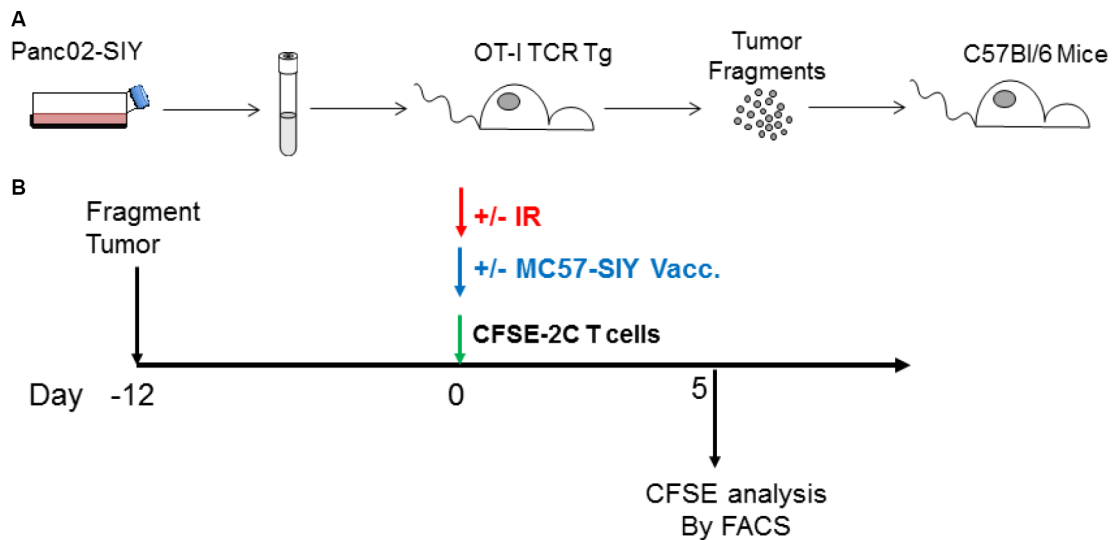

**Supplementary Figure S1:** (A) Scheme of the approach for establishing the fragment tumor model. Panc02-SIY cells were grown *in vitro* prior to subcutaneous injection of the cells in suspension to OT-1 TCR transgenic mice. 4–6 weeks post inoculation, established Panc02-SIY tumors were excised, divided into 1–2 mm fragments, and implanted subcutaneously into naive C57Bl/6 mice. Tumor growth was observed for 10–14 days prior to treatments. (B) Scheme of the strategy to detect T cell priming in DLNs by the administration of exogenous CFSE-labelled 2C T cells. Fragment tumor were established as described in (A) and received indicated treatment and/or  $5 \times 10^6$  CFSE-labelled naive 2C T cells on Day 0 (12 days post fragment transplantation). On day 5, DLNs were removed for flow cytometric analysis of CFSE intensity.

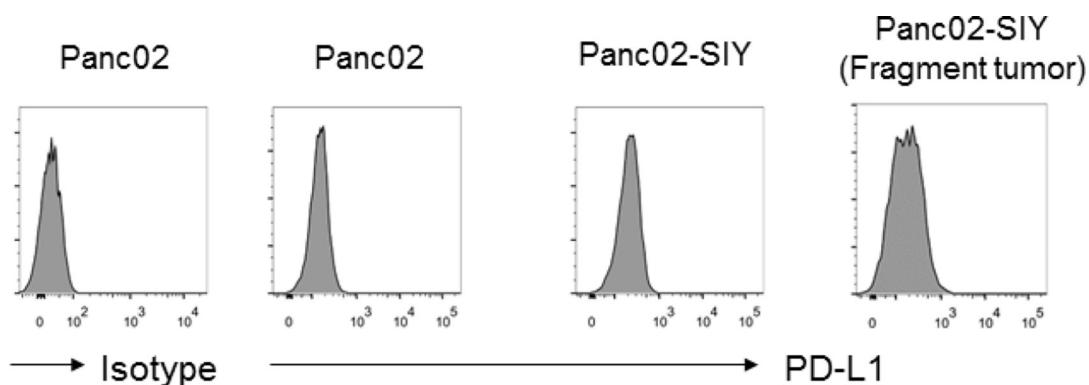

**Supplementary Figure S2: Panc02-SIY tumor cells demonstrate low PD-L1 expression.** Panc02-SIY and the parental cell line Panc02 were used for flow cytometric analysis of PD-L1 expression. Panc02-SIY fragment-tumor-bearing mice were left untreated. On day 21 post transplantation, tumors were removed from the mice and cut into small pieces. Resulting portions were culture in DMEM medium with 10% FBS for 3–4 days followed by flow cytometric analysis of PD-L1 expression on CD45<sup>+</sup> cells.

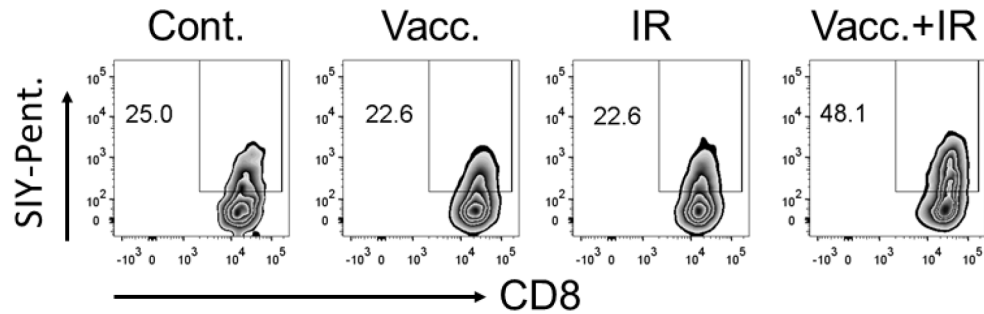

**Supplementary Figure S3: Antigen-specific vaccination plus local radiation increased percentage of antigen-specific CD8<sup>+</sup> T cells.** Panc02-SIY fragment tumor-bearing mice were left untreated (control) or received vaccination of  $2 \times 10^6$  MC57-SIY cells (Vacc.), 20 Gy local ionizing radiation (IR) or vaccination plus IR, respectively. Fragment tumors were harvested and processed for flow cytometric analysis of cell surface markers and SIY-Pentamer staining. Representative dot plots of SIY-specific T cells among all CD8<sup>+</sup> T cells are presented.

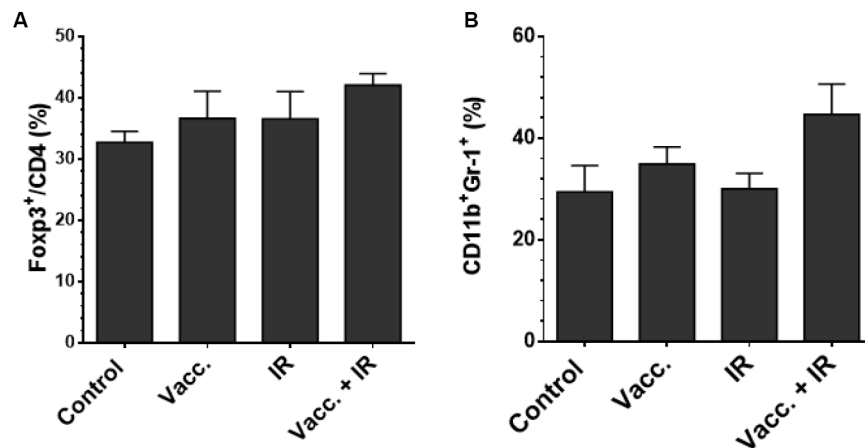

**Supplementary Figure S4: Percentage of Tregs and MDSCs in the tumors post treatments.** Panc02-SIY fragment-tumor-bearing mice were left untreated or received one of following treatments: vaccination with  $2 \times 10^6$  MC57-SIY cells, local IR (20 Gy) or a combination of both. Eight days post treatment, tumors were removed and processed for flow cytometric analysis of immunosuppressive cells, including (A) Foxp3<sup>+</sup> cells among total CD4<sup>+</sup> cells (B) CD11b<sup>+</sup>Gr-1<sup>+</sup> MDSCs. Error bars are mean  $\pm$  S.E.M. Presented data are the summary of an experiment with at least three samples in each group. The experiments were repeated at least twice.

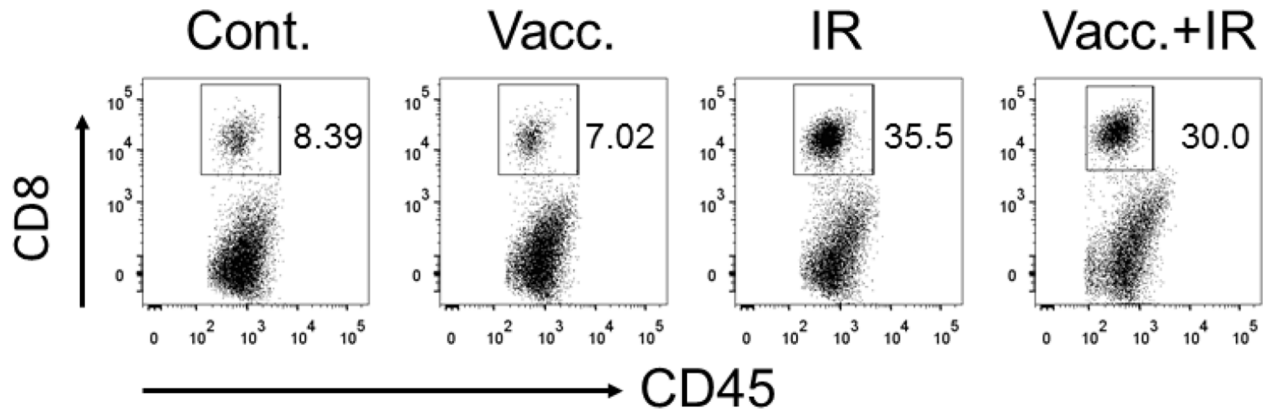

**Supplementary Figure S5: Local radiation enhances CD8<sup>+</sup> T cell infiltration in the fragment tumors.** Panc02-SIY fragment tumor-bearing mice were left untreated or received one of following treatments: vaccination of  $2 \times 10^6$  MC57-SIY cells (Vacc.), local IR (20 Gy) or a combination. Eight days post treatment, tumors were removed and processed for flow cytometric analysis. Representative dot plots of CD8<sup>+</sup> T cells among all CD45<sup>+</sup> cells are presented.

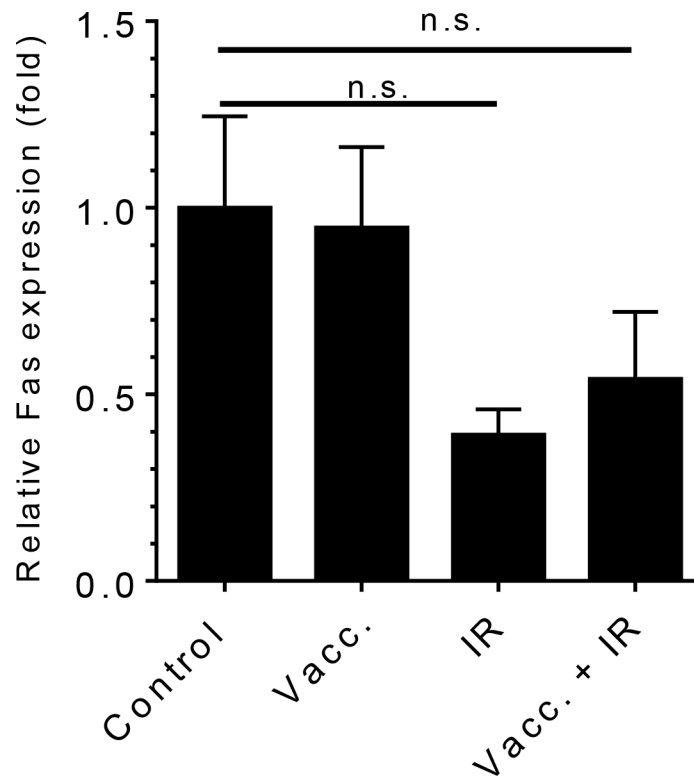

**Supplementary Figure S6: Fas expression in Panc02-SIY fragment tumor.** Panc02-SIY fragment tumor-bearing mice were left untreated or received one of following treatments: vaccination of  $2 \times 10^6$  MC57-SIY cells (Vacc.), local IR (20 Gy) or a combination. Eight days post treatment, tumors were removed from the mice and lysed using the Trizol reagent followed by RNA extraction and quantitative PCR analysis of Fas expression. n.s.: Not statistically significant. (Unpaired student's *t*-test).
